# Supplementary material for: Non-canonical Keap1-independent activation of Nrf2 in astrocytes by mild oxidative stress
Source: PubMed Central journal article supplement (PMC8512624; doi:10.1016/j.redox.2021.102158), 2021-10-02
Supplement: mmc3.pdf [file mmc3.pdf]

## Supplemental Figures

Figure S1

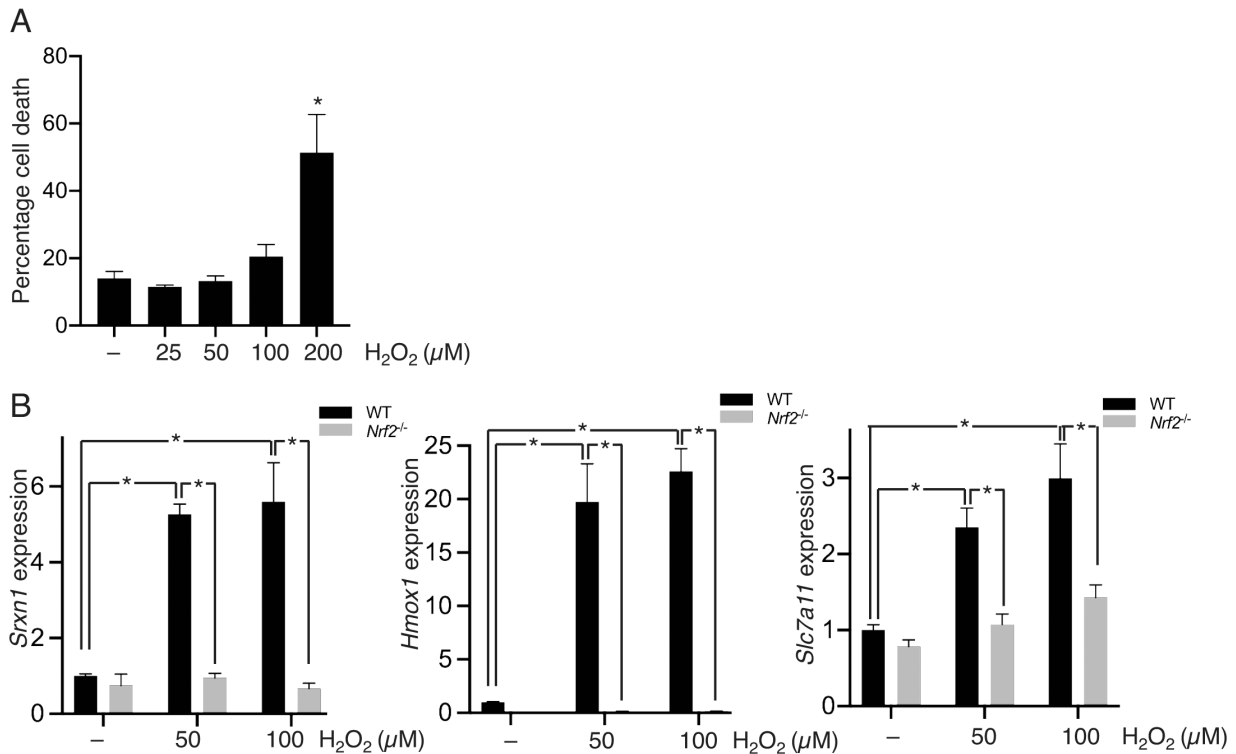

**Figure S1. A)** Cell viability in response to a range of H<sub>2</sub>O<sub>2</sub> doses. To induce oxidative stress a range of H<sub>2</sub>O<sub>2</sub> doses (25μM-200μM) was utilized and cell viability was evaluated in mixed astrocyte/neuronal cultures by assessing nuclear integrity. \**P*<0.05, one-way ANOVA with Dunnett's *post-hoc* test, (n=3-4). **B)** H<sub>2</sub>O<sub>2</sub> treatments triggers induction of *Srxn1*, *Hmox1* and *Slc7a11* expression which is eliminated by *Nrf2*-deficiency. Mixed astrocyte/neuronal cultures of the indicated genotypes were treated with the indicated doses of H<sub>2</sub>O<sub>2</sub> for 6 h, before performing qPCR analysis of gene expression (normalized to *Gapdh*). Expression levels are expressed relative to WT-control. \**P*<0.05, two-way ANOVA with Tukey's *post-hoc* test (n=3-9).

Figure S2

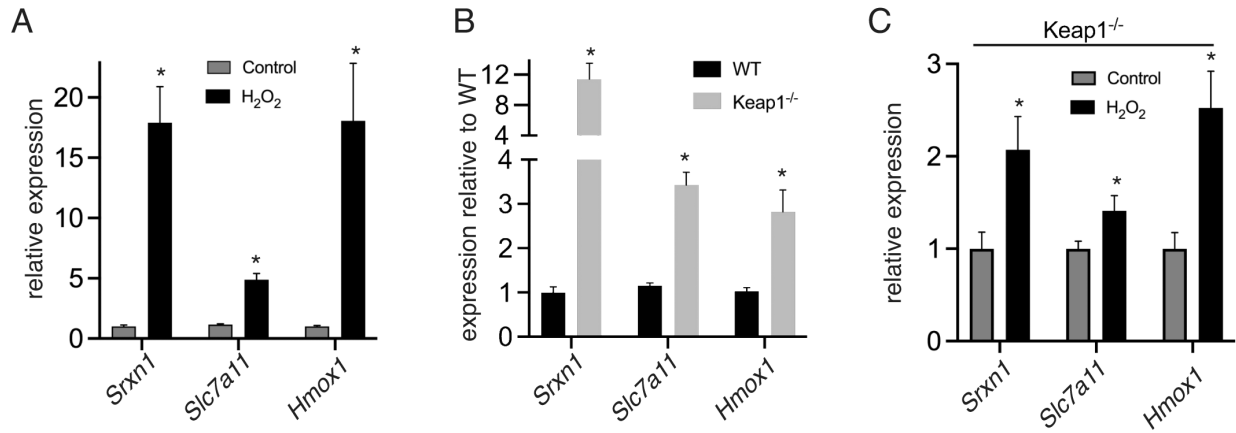

**Figure S2. A)** Mono-cultures of astrocytes were treated  $\pm$  100  $\mu$ M H<sub>2</sub>O<sub>2</sub> for 8h and the indicated genes analyzed by qPCR. \* $P$ <0.05 (unpaired t-test, n=4). **B)** RNA was extracted from mono-cultures of astrocytes from Keap1 KO mice and WT litter mates, and the indicated genes analysed by qPCR \* $P$ <0.05 (unpaired t-test, n=9-11). **C)** Keap1 KO astrocyte mono-cultures were treated as in (A) and the indicated genes analyzed. \* $P$ <0.05 (unpaired t-test, n=9-11).

Figure S3

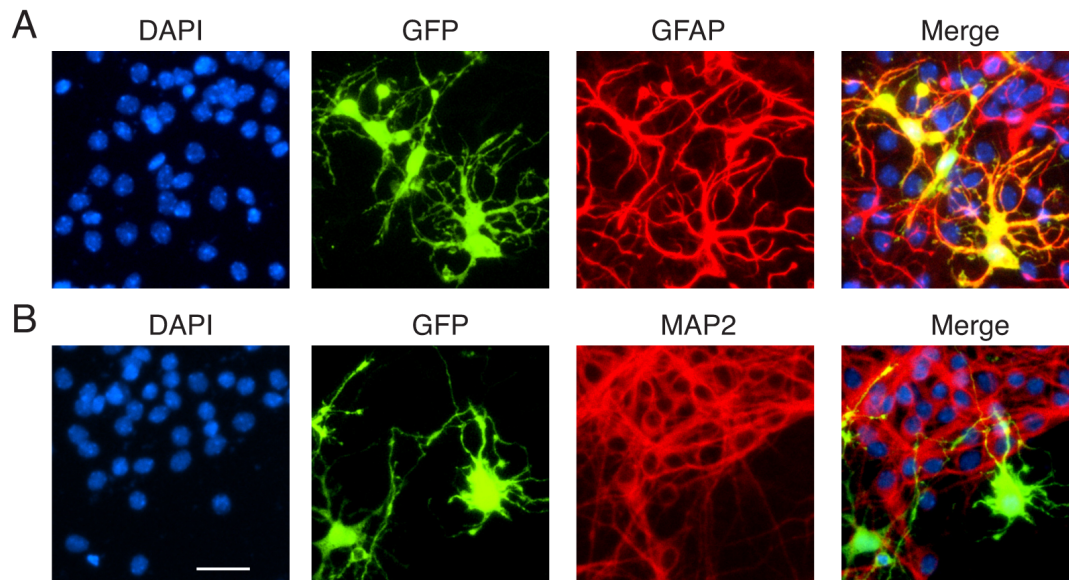

**Figure S3 A,B)** Example images of the approach to target astrocyte transfection within mixed neuronal/astrocyte cultures as described previously (Alabdullah et al., 2019; Marwick and Hardingham, 2017). GFAP is used as an astrocyte marker and MAP2 a neuronal marker Scale bar: 50  $\mu\text{m}$ .

Figure S4

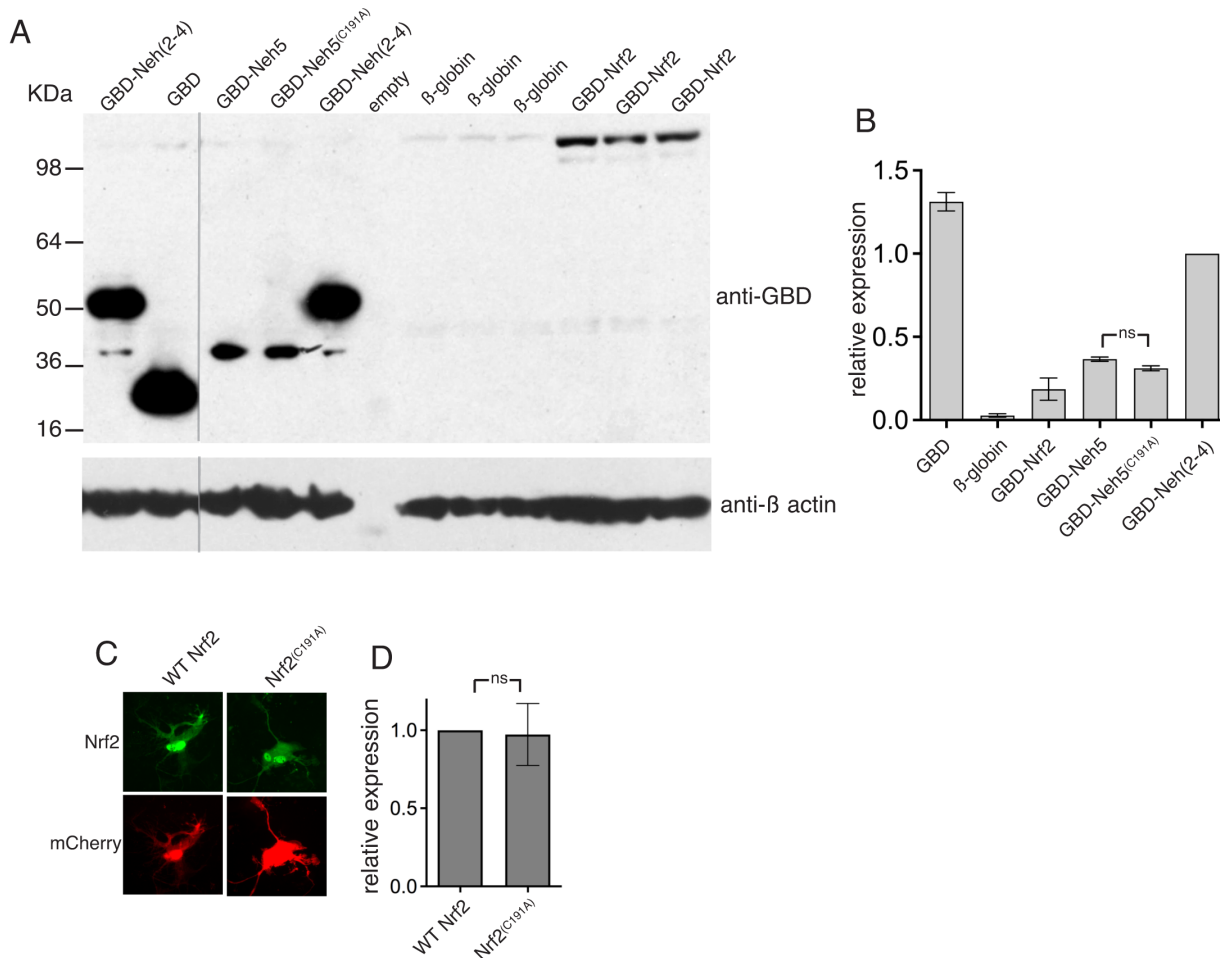

**Figure S4. A,B)** Constructs encoding the GAL4 DNA binding domain (GBD) fused to the indicated domains of Nrf2 were transfected into HEK-293 cells. At 24 h post transfection, protein was harvested and analyzed for GBD expression normalized to a  $\beta$ -actin loading control, (n=5). **C,D)** Astrocytes were transfected with constructs encoding WT or mutant Nrf2 tagged with GFP, plus a mCherry transfection marker. Levels of ectopically expressed Nrf2 were quantified in 78 (WT) and 73 (mutant) transfected cells using an anti-GFP antibody (n=4).
